# Supplementary material for: A protocol for introduction of multiple genetic modifications in Saccharomyces cerevisiae using CRISPR/Cas9
Source: PubMed Central journal article supplement — FEMS Yeast Res. 2018 Jun 1;18(7):foy063. doi: 10.1093/femsyr/foy063 (PMC6074844; doi:10.1093/femsyr/foy063), 2018-06-01
Supplement: foy063_supplement_files.pdf [file foy063_supplement_files.pdf]

## Box S4: Manual gRNA selection

Copy the sequence of the open reading frame of the gene of interest (for example from the *Saccharomyces* genome database) with the flanking regions (500-1000 bp on each side of the locus) into a DNA manager software.

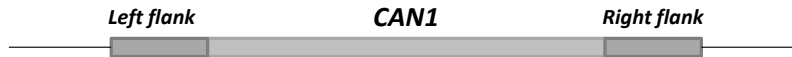

Select target sequences by selecting the 20 nucleotides before a PAM (NGG) sequence. In this example, part of the *CAN1* open reading frame is selected.

```
ctttctccag catttgggtgc ggccaatggt tacatgtatt ggtttttcttg ggcaatcact
gaaagaggtc gtaaaccacg cgggttacca atgtacataa ccaaaagaac cggttagtga
.....CAN1.....
>>.....gRNA1.....>>
                >>.....gRNA2.....>>
<<.....gRNA3.....<<
                >>.....gRNA4.....>>
                <<.....gRNA5.....<<
```

gRNA1 (5' → 3'): CCAGCATTGGTGC GGCCAA  
gRNA2 (5' → 3'): GTTACATGTATTGGTTTTCT  
gRNA3 (5' → 3'): CCATTGGCCGCACCAAATGC  
gRNA4 (5' → 3'): TTACATGTATTGGTTTTCTT  
gRNA5 (5' → 3'): AAACCAATACATGTAACCAT

Use BLAST (<https://blast.ncbi.nlm.nih.gov/>) to find potential off-targets. Any sequence with >16/20 identities that is followed by a PAM sequence is considered an off-target. Discard any sequence with off-targets.

Discard any sequences containing a stretch of six or more Ts.

Optional: calculate AT content for each sequence:

|                             |                         |
|-----------------------------|-------------------------|
| gRNA1: CCAGCATTGGTGC GGCCAA | 8/20, AT-score of 0.4   |
| gRNA2: GTTACATGTATTGGTTTTCT | 14/20, AT-score of 0.7  |
| gRNA3: CCATTGGCCGCACCAAATGC | 8/20, AT-score of 0.4   |
| gRNA4: TTACATGTATTGGTTTTCTT | 15/20, AT-score of 0.75 |
| gRNA5: AAACCAATACATGTAACCAT | 14/20, AT-score of 0.7  |

Optional: predict the RNA folding to calculate the secondary structure score (for example via <http://rna.tbi.univie.ac.at/cgi-bin/RNAWebSuite/RFold.cgi> with the folding temperature set to 30°C). As input, provide the 20bp gRNA target sequence followed by the sequence encoding the structural RNA:

```
20 bp + GTTTTAGAGCTAGAAATAGCAAGTTAAAATAAGGCTAGTCCGTTATCAACTTGAAAAAGT
GGCACCGAGTCGGTGGTGCTTTTTTTT
```

The RNA folding score is calculated by dividing the number of the 20 target sequence encoding bases predicted not to be involved in secondary structures by 20 (e.g. when no bases predicted to be involved in secondary structures results in a score of 20/20 = 1.0. Alternatively, when 7 bases are predicted to be involved in secondary structures, a score of 13/20 = 0.65 is given)

## Box S5: Manual repair fragment design for gene deletion

Note: In this example, the target for deletion is the open reading frame of *CAN1* (leaving the promoter and terminator intact). Based on the desired genotype after transformation, the homologous sequences can be chosen further away or closer to the *cas9* restriction site.

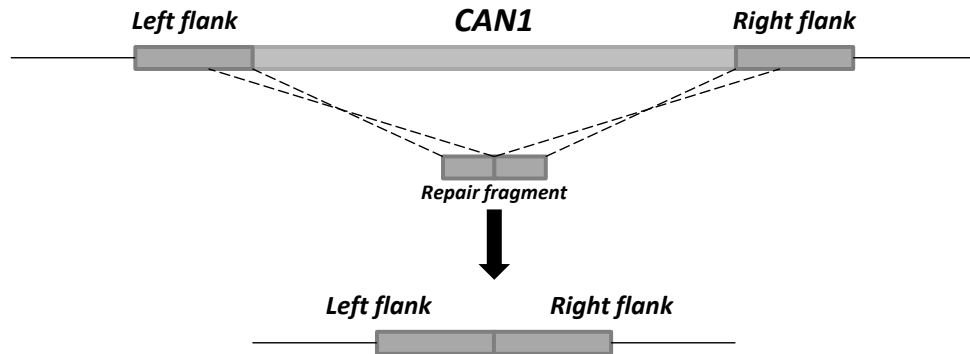

Copy the sequence of the open reading frame of the gene of interest (for example from the *Saccharomyces* genome database) with the flanking regions (500-1000 bp on each side of the locus) into a DNA manager software.

Select the 60 nucleotides up- and downstream of the *CAN1* open reading frame and add the sequences together to make the forward primer. Take the reverse-complementary sequence (e.g. via [https://www.bioinformatics.org/sms/rev\\_comp.html](https://www.bioinformatics.org/sms/rev_comp.html)) for the reverse primer.

### 60 nucleotides upstream

```

gaaagtttat ttcagagttc ttcagacttc ttaactcctg taaaaacaaa aaaaaaaaaa aggcatagca atgacaaatt caaagaaga cgccgacata
ctttcaataa aagtctcaag aagtctgaag aattgaggac atttttgttt tttttttttt tccgtatcgt tactgtttaa gttttcttct gggctgtat
>>.....CAN1.....
  
```

### 60 nucleotides downstream

```

ttttgggaca aattttggaa tgttgtagca tagatatgac gttttattac cttaatacac attcccacgc catttcgcat tctcaccctc ataagtcata
aaaaccctgt ttaaaacctt acaacatcgt atctatactg caaataatg gaaattagtg taagggtgcg gtaaagcgta agagtgggag tattcagtat
.....CAN1.....>>
  
```

Forward primer (5' → 3'):

TTCAGAGTTCTTCAGACTTCTTAACTCCTGTA AAAACAAAAAAAAAAAAAAAAAAGGCATAGCAATATGACGTTTTATT  
ACCTTTAATCACATTCCCACGCCATTTTCGCATTCTCACCTCATA

Reverse primer (5' → 3'):

TATGAGGGTGAGAATGCGAAATGGCGTGGAATGTGATTAAGGTAATAAAAACGTCATATTGCTATGCCTTTTTT  
TTTTTTTTGTTTTTACAGGAGTTAAGAAGTCTGAAGA ACTCTGAA

## Box S6: Manual repair fragment design for mutations

Copy the sequence of the open reading frame of the gene of interest (for example from the *Saccharomyces* genome database) with the flanking regions (500-1000 bp on each side of the locus) into a DNA manager software.

Design a gRNA of which either the target sequence or PAM sequence overlaps with the desired site for mutagenesis.

For the repair fragment, select 120 nucleotides, consisting of:

- 50 nucleotides upstream of the target sequence
- 20 nucleotides target sequence
- 50 nucleotides downstream of the target sequence

### 120 nucleotides

```
gtatcttaa caaccattat ttctgcgca aattcaata tttacgttg ttcccgatt ttattggtc tacaagaa caagttgct cctaaattcc tgcgaaggac caccaaagt ggtgttccat acattgcagt  
caatagaatt gttgtaata aagacggcg ttaagtatt aatgcaacc aaggcctaa aataaccag atagttott gttcaaccga ggatttaagg acagttcctg gtggtttcca ccacaagta tgaacgta  
.....CAN1.....>  
gRNA target sequence >>.....>>
```

To prevent restriction by *cas9* after DNA repair, the desired mutation is introduced in the repair fragment and should disrupt the target or PAM sequence after DNA repair.

In this example, the following target+PAM sequence was used:

TGGTCTATCAAAGAACAAGTTGG

Examples of suitable repair fragments:

- #1 TGGTCTATCAAAGAACAAGTTG (G to T, disruption of the PAM sequence)  
#2 TGGTCTATCAAAGCACAAAGTTGG ((A to C, disruption of the target sequence)

For example #1:

The forward primer is (5' → 3'):

ATTATTTCTGCCGCAAATTCAAATATTTACGTTGGTTCCCGTATTTTATTTGGTCTATCAAAGAACAAGTTGCT  
CCTAAATTCCTGTCAAGGACCACCAAAGGTGGTGTTCACATTA

And the reverse primer is (5' → 3'):

AATGTATGGAACACCACCTTTGGTGGTCCTTGACAGGAATTTAGGAGCAAACTTGTCTTTGATAGACCAAATAA  
AATACGGGAACCAACGTAAATATTTGAATTTGCGGCAGAAATAA

## Box S7: Designing primers for DNA integration

In this example, the *kanMX* marker with the *Ashbya gossypii* promoter and terminator from the plasmid pUG6 ([http://www.euroscarf.de/plasmid\\_details.php?accno=P30114](http://www.euroscarf.de/plasmid_details.php?accno=P30114)) (Güldener *et al.* 1996) is integrated in the *CAN1* locus. When aiming to integrate multiple fragments, we refer the reader to (Kuijpers *et al.* 2013) for design of the fragments.

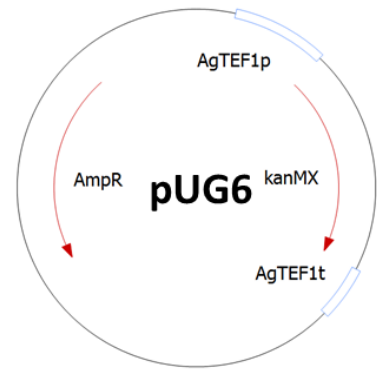

Design the forward and reverse primer for amplification of the DNA.

```
cgccgggtca ccggccagc gacatggagg cccagaatac cctccttgac agtcttgacg
gggccccagt gggccggtcg ctgtacctcc gggctcttatg ggaggaactg tcagaactgc
>>.....AgTEF1p.....
>>...kanMX forward...>>
```

```
atgcgtcaat cgtatgtgaa tgctgggtgc tatactgctg tcgattogat actaacgcgc
taocagtta gcatacactt acgaccagcg atatgacgac agctaageta tgattgcggc
.....AgTEF1t.....
<<...kanMX reverse...<<
```

Forward primer (kanMX forward, 5' → 3'): GACATGGAGGCCCAATAACC

Reverse primer (kanMX reverse, 5' → 3'): CAGTATAGCGACCAGCATTAC

Attach 60 nucleotides upstream of the *CAN1* open reading frame to the forward primer:

### 60 nucleotides upstream

```
gaaagtttat ttcagagttc ttcagacttc ttaactcctg taaaaacaaa aaaaaaaaaa aggcatagca atgacaaatt caaaagaaga cgccgacata
ctttcaataa aagtctcaag aagtctgaag aattgaggac atttttgttt tttttttttt tccgtatcgt tactgtttaa gttttcttct gggcgtgtat
>>.....CAN1.....
```

Forward primer (5' → 3'):

TTCAGAGTTCTTCAGACTTCTTAACTCCTGTAAAAACAAAAAAAAAAAAAAAAAGGCATAGCAGACATGGAGGCCCAATAACC

Attach 60 nucleotides downstream of the *CAN1* open reading frame to the reverse primer (make sure to use the reverse-complement for the correct orientation).

### 60 nucleotides downstream

```
tttgggaca aattttgaa tgttgtagca tagatatgac gttttattac cttaatcac attcccacgc catttccgat tctcaccctc ataagtcata
aaaaccctgt ttaaacctt acaacatcgt atctatactg caaaataatg gaaattagtg taagggtcgc gtaaagccta agagtgggag tattcagtat
.....CAN1.....>>
```

Reverse primer (5' → 3'):

CAGTATAGCGACCAGCATTACACTATGAGGGTGAGAATGCGAAATGGCGTGGGAATGTGATTAAAGGTAATAAAAAACGTCATAT

The resulting PCR fragment will have homologous flanks to the up- and downstream region of the *CAN1* open reading frame and will integrate *AgTEF1p-kanMX-AgTEF1t* into the *CAN1* locus.

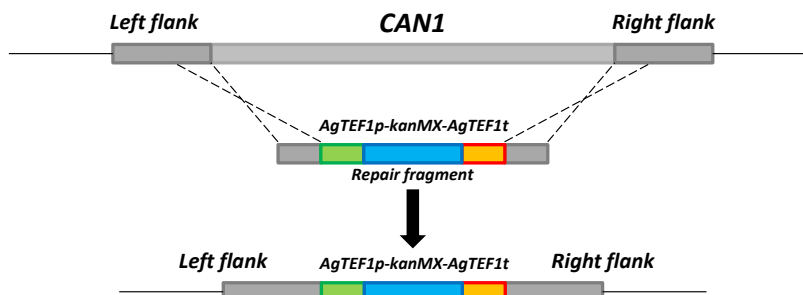

## Box S8: Manual primer design for colony PCR of yeast transformants

For confirmation of successful yeast transformations, in which a gene ORF is either deleted or used as a site for integration of (heterologous) DNA, we suggest confirming both the absence of the original gene ORF and the correct integration of DNA via PCR.

For the case of gene deletions, design primers that bind 200-500 bp outside the target ORF. This will result in a 400-1000 bp PCR product when the gene has been successfully deleted and a PCR product of 400-1000 bp + the size of the ORF when the gene is present. We recommend to take the DNA template of the parental strain along as a control.

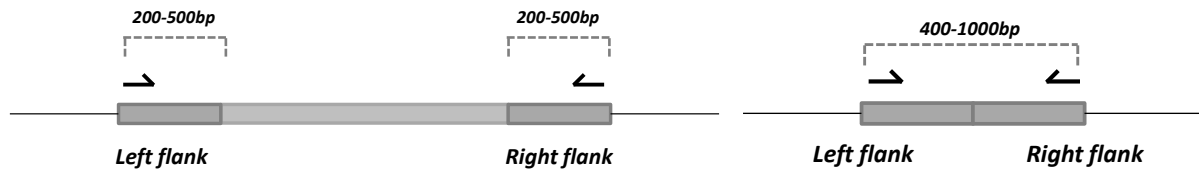

On the right: example of a typical gel when aiming for gene deletions and confirmation of 8 colonies via PCR, using primers binding outside the target ORF. The large fragments (red) correspond to colonies in which the target ORF is still present, the short fragments (green) correspond to colonies containing the gene deletion.

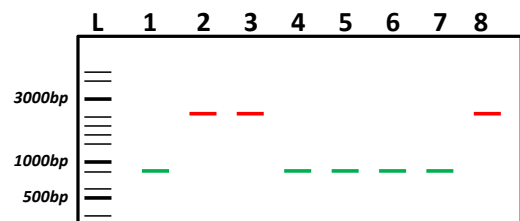

For gene integrations, design the same primers binding outside the target ORF, but also design primers binding inside the target construct such that the products of reaction 2 and 3 (see below) have a size of 500-1000 bp. Perform 3 PCR reactions per colony:

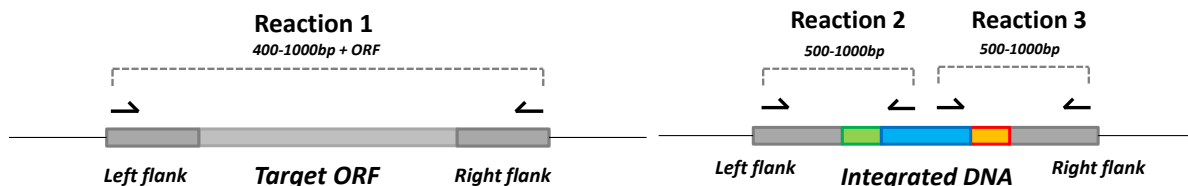

On the right: example of a typical gel when aiming for gene integration and confirmation of 3 colonies via PCR, using primers binding outside the target ORF and inside the integrated DNA. The large fragments (red) correspond to colonies in which the target ORF is still present, the short fragments (green) correspond to the results of reaction 2 and reaction 3 from colonies containing the gene integration. For integration of large constructs, usually no product is obtained in reaction 1 as the product is too long to be efficiently amplified via PCR (indicated by the "?" in the figure). When aiming to integrate multiple fragments, we refer the reader to (Kuijpers *et al.* 2013) for design of the confirmation PCR.

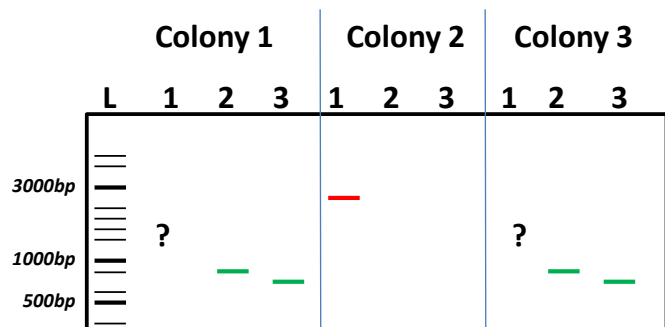

For introduction of SNPs, we recommend PCR amplification of the 1 kb region surrounding the mutation site followed by Sanger sequencing of the PCR product.

## Box S9: Plasmid removal after a/multiple round(s) of transformation

Before testing the phenotype of engineered yeast strains, we recommend removal of gRNA coding plasmids. The method described here can theoretically be used for the simultaneous removal of as many plasmids as desired, but has been demonstrated to be efficient for removal of up to at least 4 plasmids.

A -80°C stock culture or single colony with the correct genetic modification is first grown in 25 mL non-selective medium. After the culture is fully grown, 1 µL of culture is transferred to 100 mL non-selective medium. This second culture ensures growth with sufficient generations (~17) to promote plasmid loss. A fraction of the culture is then plated on a non-selective plate for single colonies. After colonies are clearly visible, 8-16 single colonies are streaked to a selective and non-selective plate. The non-selective plate is used to determine that the transferred colony was viable, the selective plate indicates which colonies have lost the plasmid. When multiple plasmids are removed simultaneously, a selective plate needs to be made for each plasmid to confirm plasmid loss for each plasmid individually (example below).

Workflow:

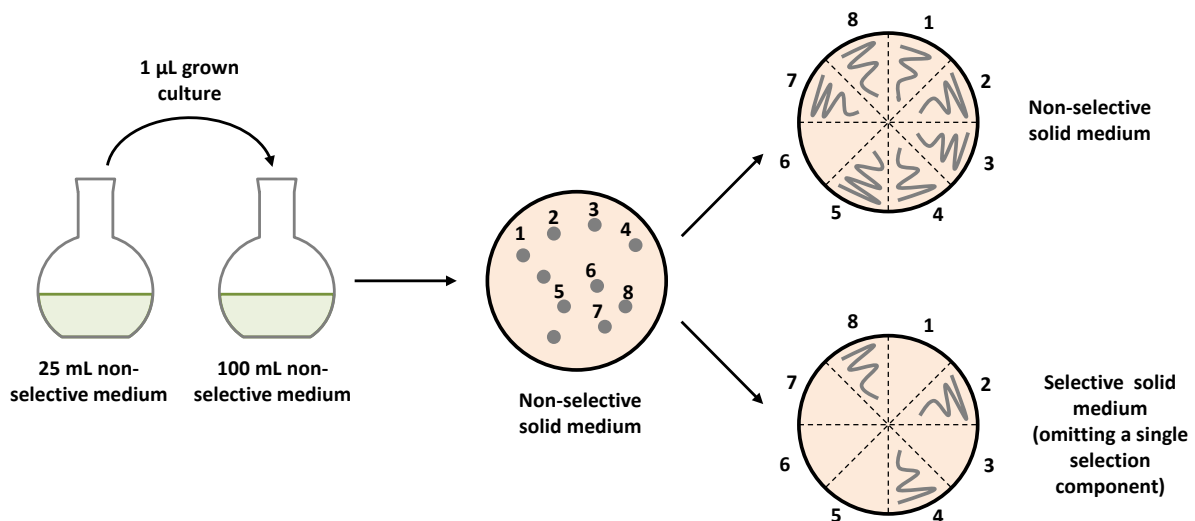

In the workflow shown above, colony #2, #4 and #8 still contain the plasmid, colony #6 was not viable and colony #1, #3, #5 and #7 were viable and successfully lost the plasmid.

Example for removal of multiple plasmids: removal of plasmids from a strain carrying pROS10, pROS14 and pROS16 (*URA3*, *LEU2* and *HIS3*):

- Non-selective medium could be YPD or SM+uracil+leucine+histidine.
- After growing in non-selective liquid medium, each single colony is restreaked on 4 plates:
  - a. SM+leucine+histidine (check for uracil auxotrophy)
  - b. SM+uracil+histidine (check for leucine auxotrophy)
  - c. SM+uracil+leucine (check for histidine auxotrophy)
  - d. YPD or SM+uracil+leucine+histidine (confirm colony viability)
- A colony that only grows on the non-selective plate ("plate d") has lost all pROS plasmids and can be used for strain characterization or further engineering.

**NOTE:** Not every transformation event requires a subsequent round of plasmid removal.

Exhausting all available markers in multiple transformations prior to a single round of plasmid removal results in the most time-efficient gene editing.
